# Supplementary material for: Survival prediction in triple negative breast cancer using multiple instance learning of histopathological images
Source: PubMed Central journal article supplement (PMC9411153; doi:10.1038/s41598-022-18647-1), 2022-08-25
Supplement: 41598_2022_18647_MOESM1_ESM.pdf [file 41598_2022_18647_MOESM1_ESM.pdf]

# Survival Prediction in Triple Negative Breast Cancer Using Multiple Instance Learning of Histopathological Images: Supplementary Materials

Piumi Sandarenu, Ewan K. A. Millar, Yang Song, Lois Browne, Julia Beretov, Jodi Lynch, Peter H. Graham, Jitendra Jonnagaddala, Nicholas Hawkins, Junzhou Huang, Erik Meijering

Table S1: C-index of 5-fold cross validation results on TNBC data using feature encodings derived from VGG16 pre-trained model.

| No. clusters | c-index for each fold |        |        |        |        | Average c-index |
|--------------|-----------------------|--------|--------|--------|--------|-----------------|
|              | 1                     | 2      | 3      | 4      | 5      |                 |
| 10           | 0.5184                | 0.5353 | 0.5312 | 0.5615 | 0.5951 | 0.5483          |
| 12           | 0.4865                | 0.5279 | 0.6719 | 0.4581 | 0.6113 | 0.5511          |

Table S2: C-index of 5-fold cross validation results on TNBC data using feature encodings derived from NIC pre-trained model for ranking-loss added from different epochs of training.

| No. clusters | Loss <sup>a</sup> (epoch) | c-index for each fold |        |                     |        |        | Average c-index |
|--------------|---------------------------|-----------------------|--------|---------------------|--------|--------|-----------------|
|              |                           | 1                     | 2      | 3                   | 4      | 5      |                 |
| 10           | 35                        | 0.6470                | 0.6118 | 0.7179 <sup>b</sup> | 0.5746 | 0.5289 | 0.6160          |
| 10           | 40                        | 0.6189                | 0.6511 | 0.7078              | 0.5519 | 0.5196 | 0.6099          |
| 10           | 0                         | 0.6007                | 0.6447 | 0.6772              | 0.5137 | 0.5117 | 0.5890          |

<sup>a</sup> Ranking loss component added to negative log partial likelihood loss from given epoch onwards.

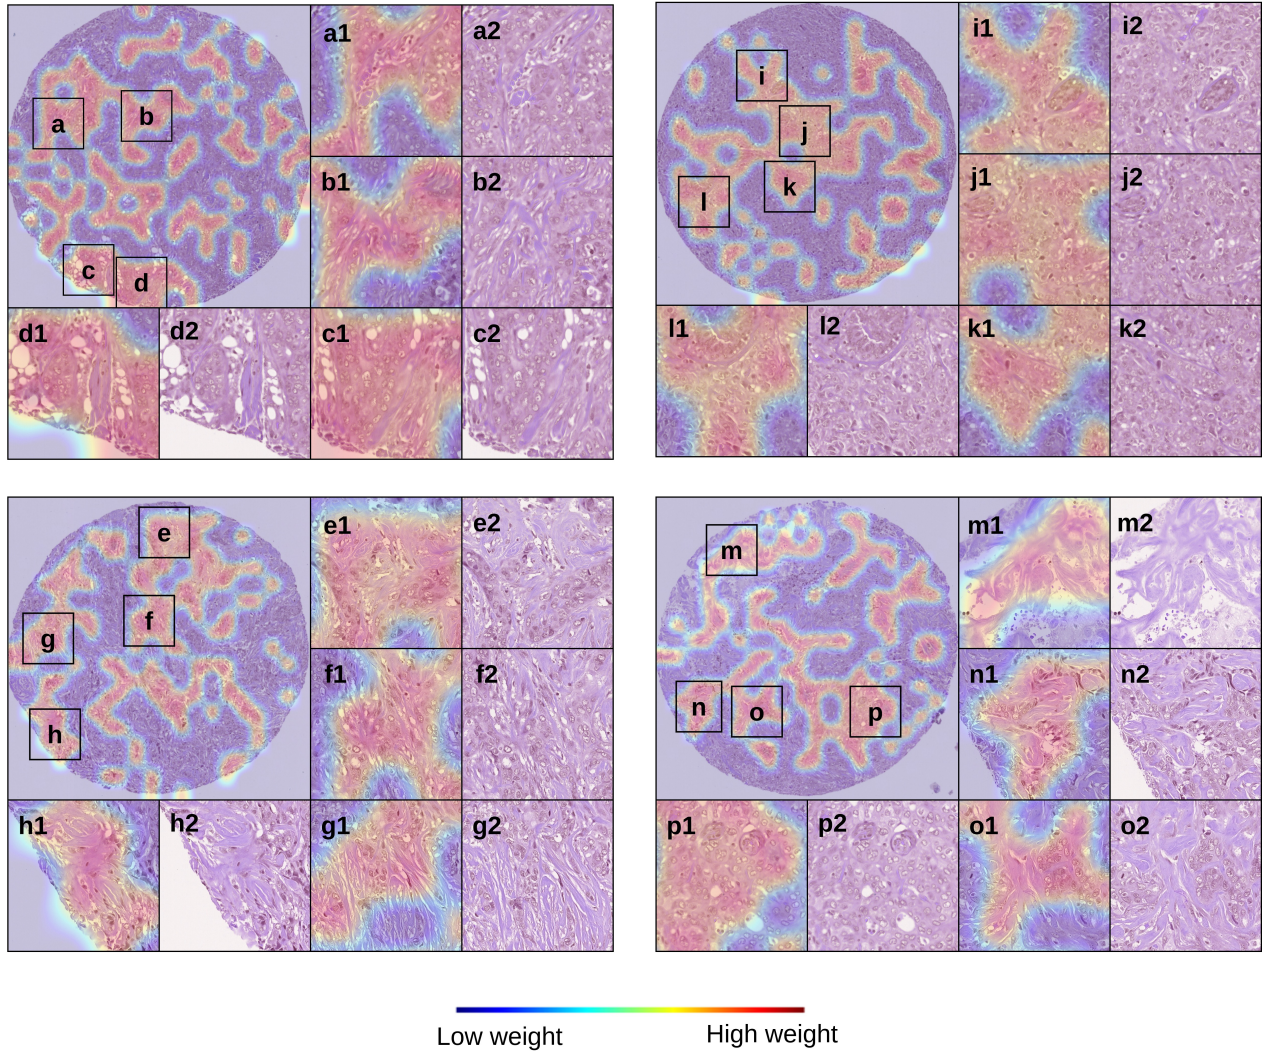

Figure S1: Heatmaps (a1-p1) and corresponding H&Es (a2-p2) from a representative case categorised as high-risk by the MIL classifier. The features present are those of a stroma-rich, low-TILs tumour and low-TILs tumour.

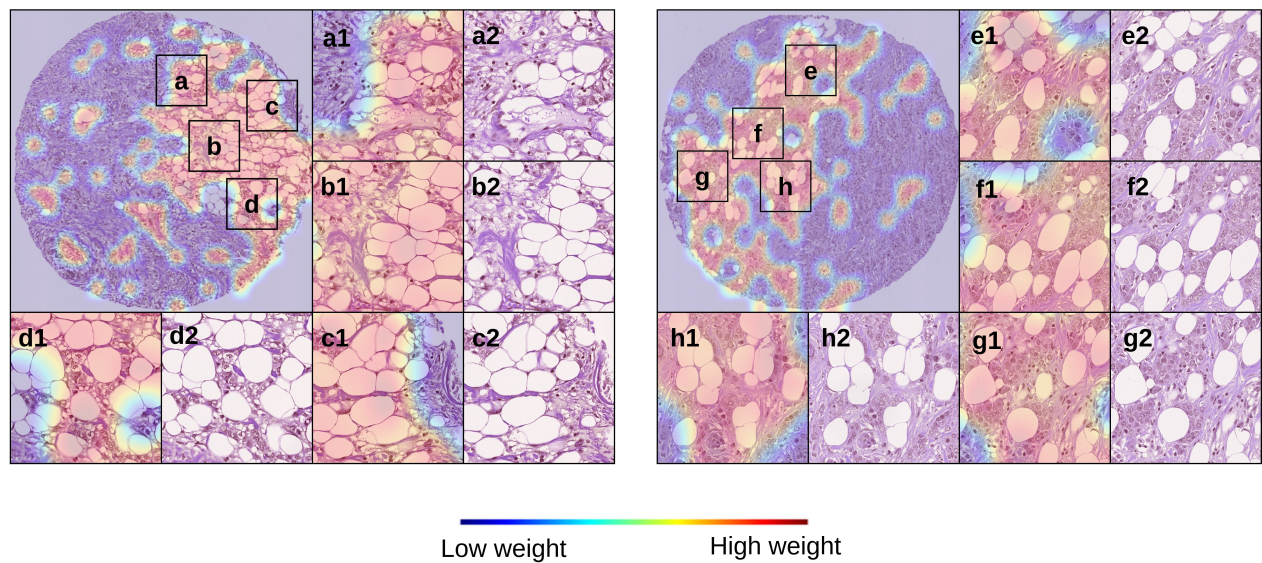

Figure S2: Heatmaps (a1-h1) and corresponding H&Es (a2-h2) from a representative case categorised as high-risk by the MIL classifier. The features present are those of low-TILs tumour with infiltration of fat by cancer cells.
